# Supplementary material
Source: Research Square preprint supplement (doi:10.21203/rs.3.rs-8854260/v1)
Supplement: Supplementary file 1 [file 8928d216de00f58e76a72103.xlsx]

## Sheet: Sheet1
Table 3. National Institutes of Health Chronic Prostatitis Symptom Index (NIH-CPSI) domain scores over time (N = 20)
Lower scores indicate less severe symptoms
Visit	Pain Score	Urinary Symptoms Score	Quality-of-Life Score
Baseline
Mean ± SD	10.6 ± 3.7	8.3 ± 2.1	10.0 ± 1.3
Median (IQR)	11.0 (9.0–13.0)	9.0 (7.8–10.0)	10.0 (9.0–11.0)
Minimum–Maximum	0.0–17.0	2.0–10.0	8.0–12.0
1 month
Mean ± SD	6.5 ± 5.6	3.9 ± 3.4	4.6 ± 4.1
Median (IQR)	6.5 (1.0–9.2)	3.0 (1.0–6.0)	5.5 (0.8–7.0)
Minimum–Maximum	0.0–17.0	0.0–10.0	0.0–12.0
Change from baseline, p value	0.01	<0.001	<0.001
Change from baseline, 95% CI	−7.16 to −1.04	−6.22 to −2.58	−7.34 to −3.36
3 months
Mean ± SD	4.0 ± 5.9	3.8 ± 3.8	4.2 ± 4.4
Median (IQR)	0.0 (0.0–7.2)	2.5 (1.0–6.5)	2.0 (1.0–8.0)
Minimum–Maximum	0.0–19.0	0.0–10.0	0.0–12.0
Change from baseline, p value	<0.001	<0.001	<0.001
Change from baseline, 95% CI	−9.73 to −3.37	−6.51 to −2.59	−7.89 to −3.61
6 months
Mean ± SD	3.8 ± 5.9	3.1 ± 3.0	3.8 ± 4.1
Median (IQR)	0.0 (0.0–6.2)	2.0 (1.0–5.2)	3.0 (0.0–5.5)
Minimum–Maximum	0.0–17.0	0.0–10.0	0.0–12.0
Change from baseline, p value	<0.001	<0.001	<0.001
Change from baseline, 95% CI	−9.99 to −3.61	−6.82 to −3.48	−8.13 to −4.17
