# Supplementary material
Source: Research Square preprint supplement (doi:10.21203/rs.3.rs-8854260/v1)
Supplement: Supplementary file 2 [file 9d78e8fbb7aee7f55749ddca.xlsx]

## Sheet: Sheet1
Table 2. International Prostate Symptom Score (IPSS) total and quality-of-life scores over time (N = 20)
Lower scores indicate less severe symptoms
Visit	IPSS Total Score	IPSS Quality-of-Life Score
Baseline
Mean ± SD	25.9 ± 5.5	5.2 ± 0.9
Median (IQR)	24.0 (23.0–30.0)	5.0 (4.8–6.0)
Minimum–Maximum	10.0–35.0	3.0–6.0
1 month
Mean ± SD	13.2 ± 9.1	2.3 ± 2.1
Median (IQR)	12.5 (5.5–20.0)	2.0 (0.0–3.0)
Minimum–Maximum	2.0–30.0	0.0–6.0
Change from baseline, p value	<0.001	<0.001
Change from baseline, 95% CI	−17.45 to −7.75	−3.92 to −1.78
3 months
Mean ± SD	9.9 ± 7.5	2.2 ± 2.0
Median (IQR)	8.5 (4.0–14.8)	1.5 (1.0–3.2)
Minimum–Maximum	0.0–27.0	0.0–6.0
Change from baseline, p value	<0.001	<0.001
Change from baseline, 95% CI	−20.14 to −11.66	−3.93 to −1.87
6 months
Mean ± SD	9.5 ± 8.3	2.0 ± 2.0
Median (IQR)	8.0 (3.0–12.2)	2.0 (0.0–3.0)
Minimum–Maximum	0.0–29.0	0.0–6.0
Change from baseline, p value	<0.001	<0.001
Change from baseline, 95% CI	−20.89 to −11.81	−4.11 to −2.09
