# Supplementary material
Source: Research Square preprint supplement (doi:10.21203/rs.3.rs-8854260/v1)
Supplement: Supplementary file 3 [file b975b90a45810e058966f053.xlsx]

## Sheet: Sheet1
Table 1. Baseline demographic and clinical characteristics of the study cohort (N = 20)
Characteristic	Value
Total participants, n	20
Age, years
Median (IQR)	67.0 (61.8–72.2)
Minimum–Maximum	54.0–88.0
Race, n (%)
White	10 (50.0)
Black or African American	3 (15.0)
Asian Indian	2 (10.0)
East Asian	2 (10.0)
Other	3 (15.0)
Ethnicity, n (%)
Hispanic, Latino/a, or Spanish origin	1 (5.0)
Not Hispanic, Latino/a, or Spanish origin	15 (75.0)
Other Hispanic, Latino/a, or Spanish origin	3 (15.0)
Not reported	1 (5.0)
Body mass index, kg/m²
Median (IQR)	28.7 (25.0–31.2)
Minimum–Maximum	17.3–41.4
Prostate volume, mL
Median (IQR)	62.6 (46.0–94.5)
Minimum–Maximum	24.8–133.6
Urine culture, n (%)
Negative	20 (100)
Positive	0 (0)
Urinalysis parameters
Urine pH (n = 17), median (IQR)	6.5 (5.5–7.0)
Urine pH, minimum–maximum	5.0–7.5
Blood, urine, n (%)
Negative	9 (45.0)
Positive	9 (45.0)
Not available	2 (10.0)
Red blood cells, urine (n = 4), median (IQR)	19.0 (5.5–148.2)
Red blood cells, urine, minimum–maximum	1.0–500.0
White blood cells, urine (n = 6), median (IQR)	8.5 (1.2–30.0)
White blood cells, urine, minimum–maximum	1.0–105.0
Bacteria, urine, n (%)
Positive	1 (5.0)
Negative	5 (25.0)
Not available	14 (70.0)
Nitrite, urine, n (%)
Negative	17 (85.0)
Positive	0 (0)
Not available	3 (15.0)
Leukocyte esterase, urine, n (%)
Negative	14 (70.0)
Positive	3 (15.0)
Not available	3 (15.0)
Glucose, urine (qualitative), n (%)
Negative	15 (75.0)
Positive	3 (15.0)
Not available	2 (10.0)
Protein, urine (qualitative), n (%)
Negative	14 (70.0)
Positive	4 (20.0)
Not available	2 (10.0)
